# Supplementary material for: Long non-coding RNAs and latent HIV – A search for novel targets for latency reversal
Source: PubMed Central journal article supplement (PMC6844474; doi:10.1371/journal.pone.0224879), 2019-11-11

A.

| Pathways unique for cultured T <sub>CM</sub> model | Common pathways for cultured T <sub>CM</sub> and bystander models | Pathways unique for bystander model                      |
|----------------------------------------------------|-------------------------------------------------------------------|----------------------------------------------------------|
| ASTHMA                                             | RIBOSOME                                                          | GLYCEROPHOSPHOLIPID_METABOLISM                           |
| LYSOSOME                                           | SPLICEOSOME                                                       | UBIQUITIN_MEDIATED_PROTEOLYSIS                           |
| PYRIMIDINE_METABOLISM                              | SYSTEMIC_LUPUS_ERYTHEMATOSUS                                      | PENTOSE_PHOSPHATE                                        |
| CELL_CYCLE                                         | GLYCOSAMINEGLYCAN_BIOSYNTHESIS_HEPARAN_SULPHATE                   | NOTCH_SIGNALING                                          |
| NATURAL_KILLER_CELL_MEDIATED_CYTOTOXICITY          | CYTOKINE_CYTOKINE_RECEPTOR_INTERACTION                            | ABC_TRANSPORTERS                                         |
| SPHINGOLIPID_METABOLISM                            | CELL_ADHESION_MOLECULES_CAMS                                      | DILATED_CARDIOMYOPATHY                                   |
| VEGF_SIGNALING                                     | FATTY_ACID_METABOLISM                                             | ECM_RECEPTOR_INTERACTION                                 |
| PRIMARY_IMMUNODEFICIENCY                           | INTESTINAL_IMMUNE_NETWORK_FOR_IGA_PRODUCTION                      | HUNTINGTONS_DISEASE                                      |
| ENDOCYTOSIS                                        | TYPE_I_DIABETES_MELLITUS                                          | MTOR_SIGNALING                                           |
| N_GLYCAN_BIOSYNTHESIS                              | ALLOGRAFT_REJECTION                                               | WNT_SIGNALING                                            |
| PURINE_METABOLISM                                  | COMPLEMENT_AND_COAGULATION_CASCADES                               | GLYCOSAMINOGLYCAN_DEGRADATION                            |
| DRUG_METABOLISM_OTHER_ENZYMES                      | GRAFT_VERSUS_HOST_DISEASE                                         | ONE_CARBON_POOL_BY_FOLATE                                |
| FRUCTOSE_AND_MANNOSE_METABOLISM                    | AUTOIMMUNE_THYROID_DISEASE                                        | ARACHIDONIC_ACID_METABOLISM                              |
| DORSO_VENTRAL_AXIS_FORMATION                       | PATHOGENIC_ESCHERICHIA_COLI_INFECTION                             | PYRUVATE_METABOLISM                                      |
| B_CELL_RECEPTOR_SIGNALING                          | AMINOACYL_TRNA_BIOSYNTHESIS                                       | MISMATCH_REPAIR                                          |
| THYROID_CANCER                                     | RNA_DEGRADATION                                                   | ARGININE_AND_PROLINE_METABOLISM                          |
| ALANINE_ASPARTATE_AND_GLUTAMATE_METABOLISM         | RNA_POLYMERASE                                                    | BASE_EXCISION_REPAIR                                     |
| INOSITOL_PHOSPHATE_METABOLISM                      | GLYCOSAMINEGLYCAN_BIOSYNTHESIS_CHONDROITIN_SULPHATE               | GLYCOSPHINGOLIPID_BIOSYNTHESIS_LACTO_AND_NEOLACTO_SERIES |
| PHOSPHATIDYLINOSITOL_SIGNALING_SYSTEM              | P53_SIGNALING                                                     | GLYCINE_SERINE_AND_THREONINE_METABOLISM                  |
| LEISHMANIA_INFECTION                               | STARCH_AND_SUCROSE_METABOLISM                                     | O_GLYCAN_BIOSYNTHESIS                                    |
| ANTIGEN_PROCESSING_AND_PRESENTATION                | PROTEIN_EXPORT                                                    |                                                          |
| CYSTEIN_AND_METHIONINE_METABOLISM                  | PROTEASOME                                                        |                                                          |
| ENDOMETRIAL_CANCER                                 | HEMATOPOIETIC_CELL_LINEAGE                                        |                                                          |
| VALINE_LEUCINE_AND_ISOLEUCINE_DEGRADATION          | GLUTATHIONE_METABOLISM                                            |                                                          |
| DNA_REPLICATION                                    | HYPERTROPHIC_CARDIOMYOPATHY_HCM                                   |                                                          |
| AMINO_SUGAR_AND_NUCLEOTIDE_SUGAR_METABOLISM        | VIRAL_MYOCARDITIS                                                 |                                                          |
| BUTANOATE_METABOLISM                               | OCYTE_MEIOSIS                                                     |                                                          |
| HOMOLOGOUS_RECOMBINATION                           | STEROID_BIOSYNTHESIS                                              |                                                          |
| GLYCOLYSIS_GLUCCONEOGENESIS                        | PARKINSONS_DISEASE                                                |                                                          |
| PPAR_SIGNALING                                     | PEROXISOME                                                        |                                                          |
| REGULATION_OF_ACTIN_CYTOSKELETON                   | GALACTOSE_METABOLISM                                              |                                                          |
| PORPHYRIN_AND_CHLOROPHYLL_METABOLISM               | CARDIAC_MUSCLE_CONTRACTION                                        |                                                          |
| CYTOSOLIC_DNA_SENSING                              | OXIDATIVE_PHOSPHORYLATION                                         |                                                          |
| TRYPTOPHAN_METABOLISM                              | CITRATE_CYCLE_TCA_CYCLE                                           |                                                          |
| JAK_STAT_SIGNALING                                 | BASAL_CELL_CARCINOMA                                              |                                                          |
| COLORECTAL_CANCER                                  | METABOLISM_OF_XENOBIOTICS_BY_CYTOCHROME_P450                      |                                                          |
| BASAL_TRANSCRIPTION_FACTORS                        | TGF_BETA_SIGNALING                                                |                                                          |
| NUCLEOTIDE_EXCISION_REPAIR                         | ALZHEIMERS_DISEASE                                                |                                                          |
| PROGESTERONE_MEDIATED_OOCYTE_MATURATION            | LEUKOCYTE_TRANSENDOTHELIAL_MIGRATION                              |                                                          |
| CHEMOKINE_SIGNALING                                |                                                                   |                                                          |
| HEDGEHOG_SIGNALING                                 |                                                                   |                                                          |

B.

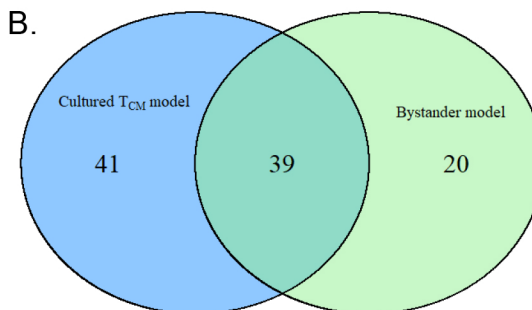

Supplement: pone.0224879.s004.pdf [file pone.0224879.s004.pdf]
