# Supplementary material for: Long non-coding RNAs and latent HIV – A search for novel targets for latency reversal
Source: PubMed Central journal article supplement (PMC6844474; doi:10.1371/journal.pone.0224879), 2019-11-11

A.

| Pathways unique for cultured T <sub>CM</sub> model | Common pathways for cultured T <sub>CM</sub> and Spina models | Pathways unique for bystander model |
|----------------------------------------------------|---------------------------------------------------------------|-------------------------------------|
| VEGF                                               | MCALPAIN                                                      | RAC1                                |
| TH1TH2                                             | TOB1                                                          | MITOCHONDRIA                        |
| INTEGRIN                                           | TGFB                                                          | DEATH                               |
| G2                                                 | ATM                                                           | NKT                                 |
| ATRBRCA                                            | RHO                                                           | VIP                                 |
| IL10                                               | CDC42RAC                                                      | RELA                                |
| BIOPEPTIDES                                        | MPR                                                           | NTHI                                |
| MCM                                                | PROTEASOME                                                    | ETS                                 |
| RACCYCD                                            | BCELLSURVIVAL                                                 | RARRXR                              |
| G1                                                 | EDG1                                                          | CARM_ER                             |
| CELLCYCLE                                          | IL7                                                           | FMLP                                |
| TNFR1                                              | ARAP                                                          | SPPA                                |
| STRESS                                             | TNFR2                                                         | ERK                                 |
| NFKB                                               | GCR                                                           | PML                                 |
| STATHMIN                                           | NGF                                                           | P53HYPOXIA                          |
| CHREBP2                                            | TCR                                                           | P53                                 |
| HER2                                               | EPO                                                           | BAD                                 |
| IL2RB                                              | IL6                                                           | IGF1R                               |
| CD40                                               | INSULIN                                                       | CREB                                |
| TID                                                | EIF                                                           | GLEEVEC                             |
| CDMAC                                              | MTOR                                                          | TFF                                 |
| TPO                                                | IGF1MTOR                                                      | ERK5                                |
| EGF                                                |                                                               | PTEN                                |
| PDGF                                               |                                                               | RAS                                 |
| CCR5                                               |                                                               | AKT                                 |
| GPCR                                               |                                                               | CTLA4                               |
| AT1R                                               |                                                               | CSK                                 |
| IL2                                                |                                                               | ACTINY                              |
| EIF4                                               |                                                               |                                     |
| WNT                                                |                                                               |                                     |
| TEL                                                |                                                               |                                     |

B.

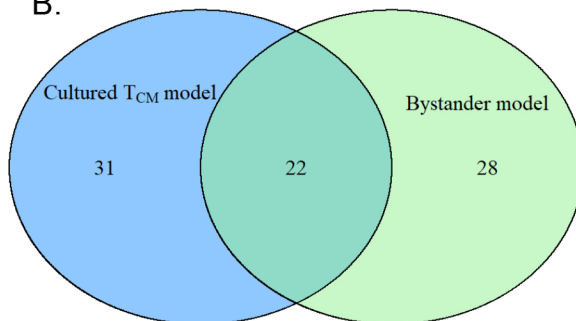

Supplement: pone.0224879.s005.pdf [file pone.0224879.s005.pdf]
