# Supplementary material for: Long non-coding RNAs and latent HIV – A search for novel targets for latency reversal
Source: PubMed Central journal article supplement (PMC6844474; doi:10.1371/journal.pone.0224879), 2019-11-11

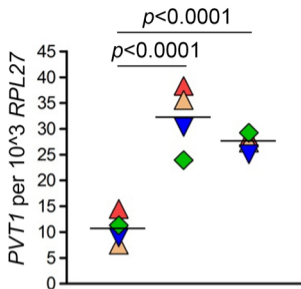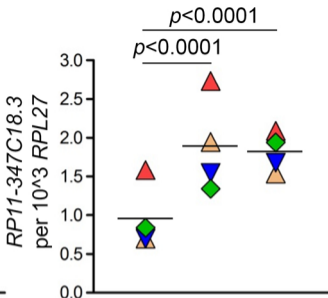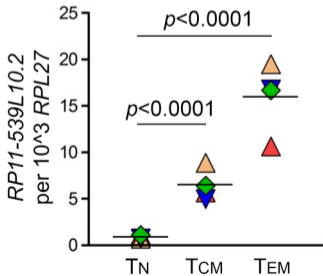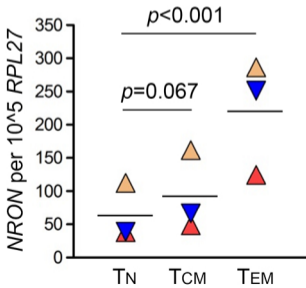

Supplement: pone.0224879.s003.pdf [file pone.0224879.s003.pdf]
